# Supplementary material
Source: publisher figshare collection journal article supplement (https://tandf.figshare.com/ndownloader/files/40097905)

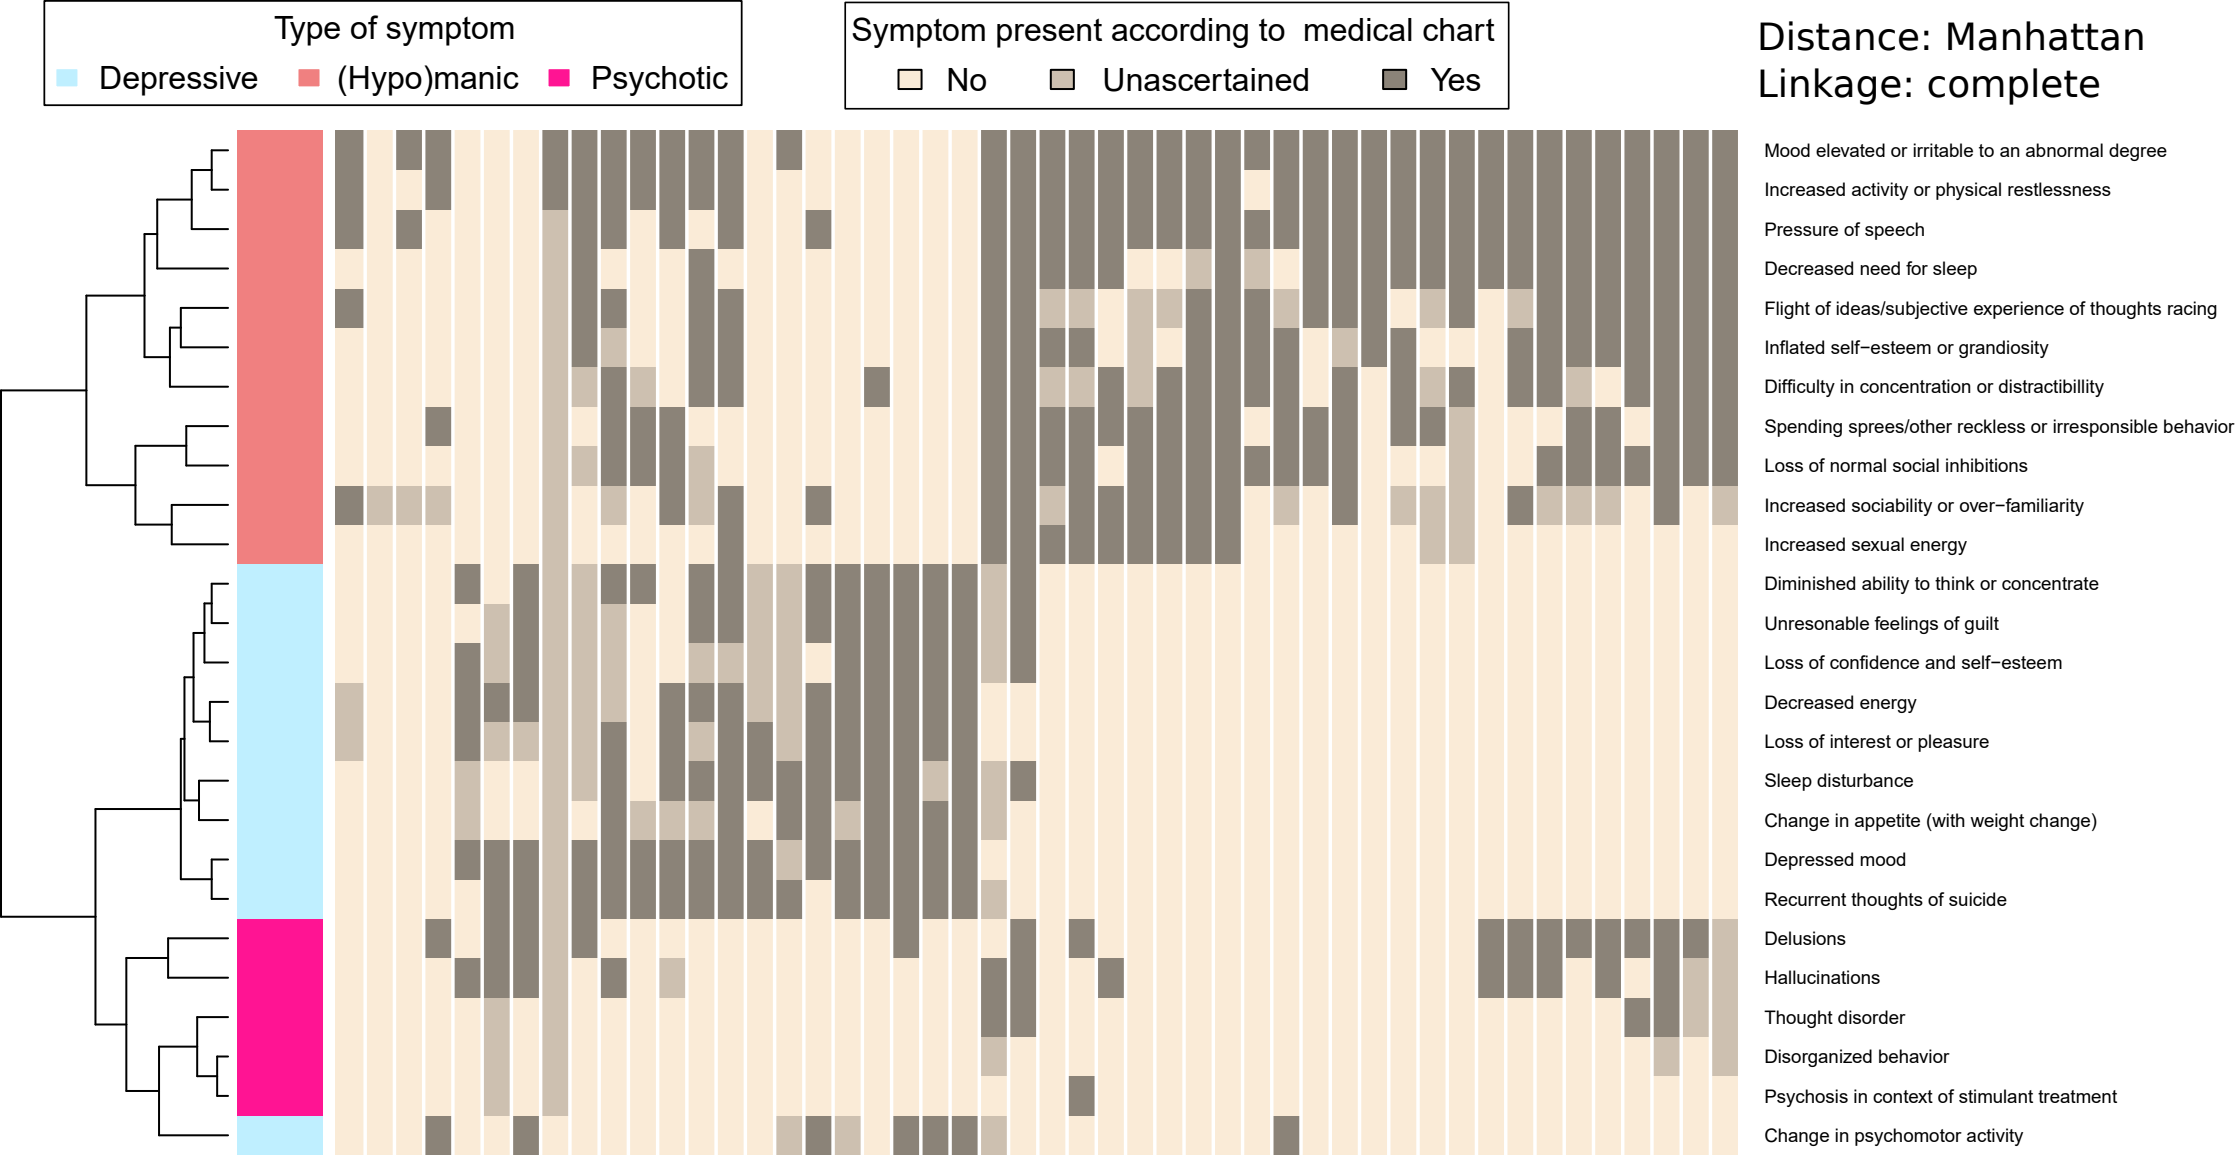

Supplement: Supplementary file 1 [file 40097905]
